# Supplementary material
Source: PubMed Central journal article supplement (PMC2838039)
Supplement: supp_192_7_1975__1.pdf [file supp_192_7_1975__1.pdf]

1 Nishikawa and Duncan, SUPPLEMENTAL TABLE S1.

2  
3 **TABLE S1. Relative quantification analysis of *fimSR* and *fimA*-related genes expression in strains**  
4 **33277 and W83 by  $\Delta\Delta C_T$  method.**

| 5      | 6     | 7           | 8                  | 9                            | 10                   | 11              | 12           |
|--------|-------|-------------|--------------------|------------------------------|----------------------|-----------------|--------------|
| Strain | gene  | Avg $C_T^a$ | Avg $\Delta C_T^b$ | $\Delta C_T$ SD <sup>c</sup> | $\Delta\Delta C_T^d$ | RQ <sup>e</sup> |              |
| 8      | 33277 | <i>fimA</i> | 16.230375          | 11.657747                    | 0.04586264           | 0.0             | 1.0          |
| 9      | 33277 | <i>fimS</i> | 22.32254           | 17.749912                    | 0.022366915          | 0.0             | 1.0          |
| 10     | 33277 | <i>fimR</i> | 19.506887          | 14.934259                    | 0.04442617           | 0.0             | 1.0          |
| 11     | 33277 | <i>fimX</i> | 14.920545          | 10.347916                    | 0.023265244          | 0.0             | 1.0          |
| 12     | 33277 | <i>pgmA</i> | 15.927211          | 11.354582                    | 0.028491484          | 0.0             | 1.0          |
| 13     | 33277 | <i>glk</i>  | 18.928392          | 14.355764                    | 0.010255761          | 0.0             | 1.0          |
| 14     | 33277 | 16SrRNA     | 4.5726285          | -                            | -                    | -               | -            |
| 15     | W83   | <i>fimA</i> | 24.91251           | 19.980543                    | 0.015474653          | 8.322796        | 0.0031231209 |
| 16     | W83   | <i>fimS</i> | 23.901964          | 18.969997                    | 0.02164793           | 1.2200851       | 0.4292574    |
| 17     | W83   | <i>fimR</i> | 20.96205           | 16.030083                    | 0.018008143          | 1.0958233       | 0.46786904   |
| 18     | W83   | <i>fimX</i> | 22.938131          | 18.006165                    | 0.01901394           | 7.658249        | 0.0049503664 |
| 19     | W83   | <i>pgmA</i> | 23.331947          | 18.39998                     | 0.011158608          | 7.0453987       | 0.007570484  |
| 20     | W83   | <i>glk</i>  | 18.695807          | 13.76384                     | 0.0141396765         | -0.59192467     | 1.5072562    |
| 21     | W83   | 16SrRNA     | 4.9319673          | -                            | -                    | -               | -            |

22  
23 a. Average threshold cycle ( $C_T$ ) of three independent reactions. Each reaction contains an equal amount  
24 of cDNA templates from three biological replicates.

25 b. (Avg  $C_T$  of each gene) – (Avg  $C_T$  of 16SrRNA)

26 c. Standard deviation of  $\Delta C_T$

27 d. Avg  $\Delta C_T$  – (33277 Avg  $\Delta C_T$ )

28 e.  $2^{-\Delta\Delta C_T}$

29
